# Supplementary material for: The preparation of a phosphorus doped silicon film from phosphorus containing silicon nanoparticles
Source: Royal Society of Chemistry journal article supplement (doi:10.1039/b513330k), 2006-01-01

# Supplementary Material (ESI) for Chemical Communications  
# This journal is (c) The Royal Society of Chemistry 2006

## **The preparation of a phosphorus doped silicon film from phosphorus containing silicon nanoparticles**

**Richard K. Baldwin, Jing Zou, Katherine A. Pettigrew, Gregory J. Yeagle, R. David Britt and Susan M. Kauzlarich\***

*<sup>a</sup> Department of Chemistry, University of California, One Shields Avenue, Davis, CA 95616, U.S.A., Fax: (530) 752-8995; Tel: (530) 752-4756; \* E-mail: [smkauzlarich@ucdavis.edu](mailto:smkauzlarich@ucdavis.edu)<sup>c</sup>*

**Supplemental Material (<sup>1</sup>H and <sup>13</sup>C NMR)**

# $^1\text{H}$ NMR

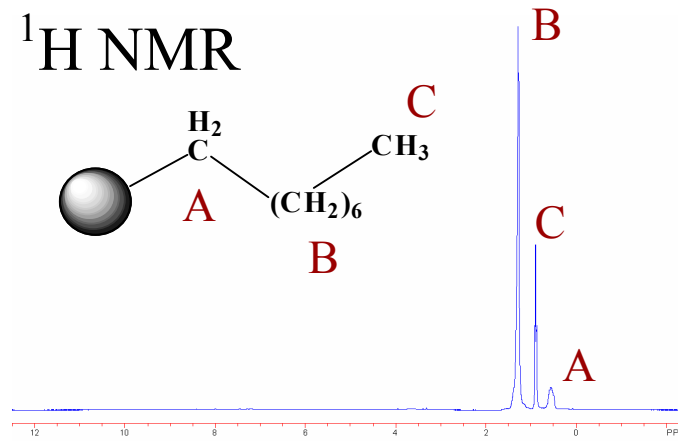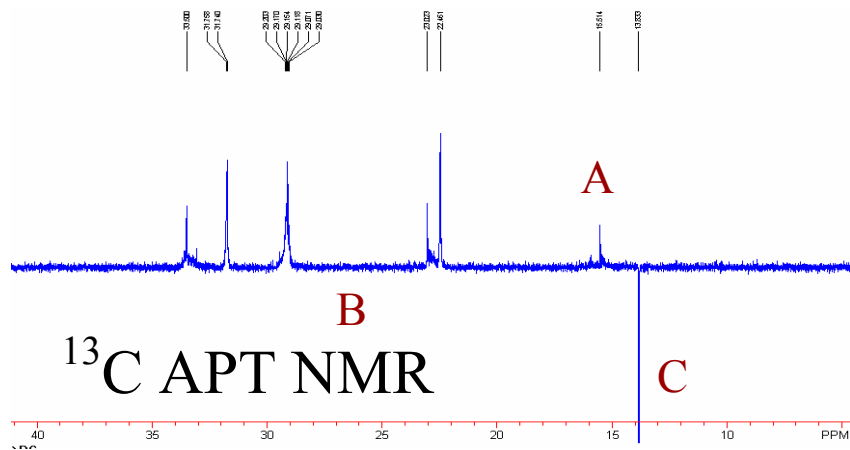

Supplement: b513330k.pdf [file b513330k.pdf]
